# Supplementary material for: A single-source precursor route to a Cu/V2O5 composites as surface-enhanced Raman scattering substrates and catalysts for cross coupling
Source: Royal Society of Chemistry journal article supplement (doi:10.1039/c3ra46696e), 2013-12-20
Supplement: c3ra46696e.pdf [file c3ra46696e.pdf]

# A single-source precursor route to Cu/V<sub>2</sub>O<sub>5</sub> composite as surface-enhanced Raman scattering substrates and catalysts for cross coupling reaction

Qian Cai, Fan Liao, Fei Hu, Yanqing Li\*, Tao Wang, Mingwang Shao\*

Institute of Functional Nano & Soft Materials (FUNSOM), Jiangsu Key Laboratory for Carbon-based Functional Materials and Devices & Collaborative Innovation Center of Suzhou Nano Science and Technology, Soochow University, Suzhou 215123, P. R. China

## 1. The normal Raman spectrum of 0.01 M R6G methanol solution

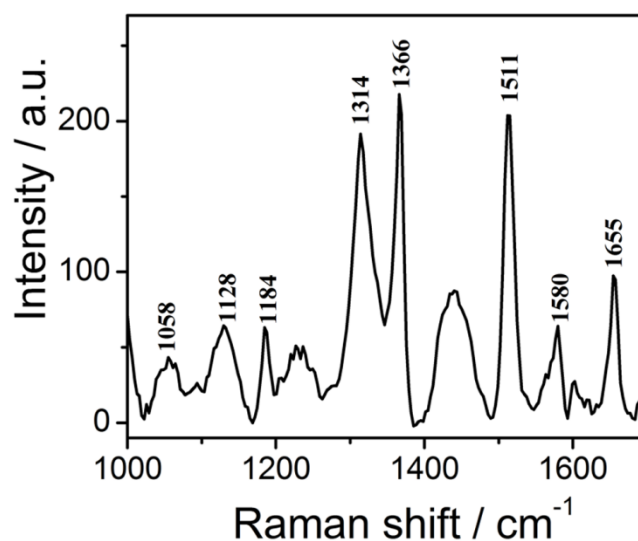

FigureS1. The normal Raman spectrum of 0.01 M R6G methanol solution.

## 2. The normal Raman spectrum of MBA powder

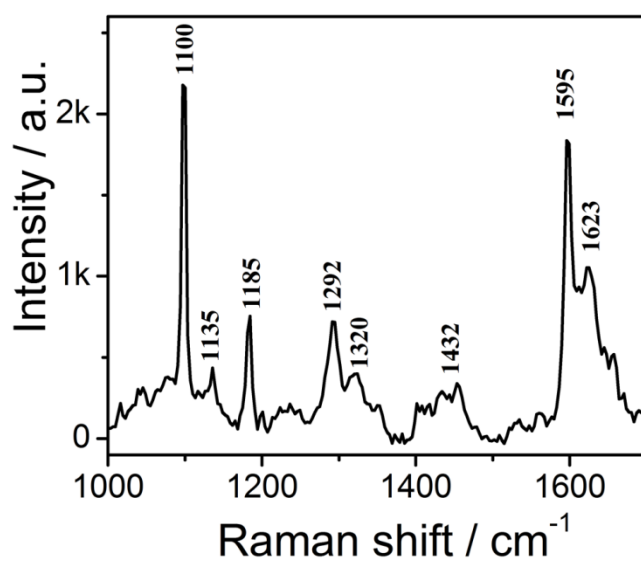

Figure S2. The normal Raman spectrum of MBA powder.

## 3. Distribution histograms of the width and length of V<sub>2</sub>O<sub>5</sub> nanoribbons

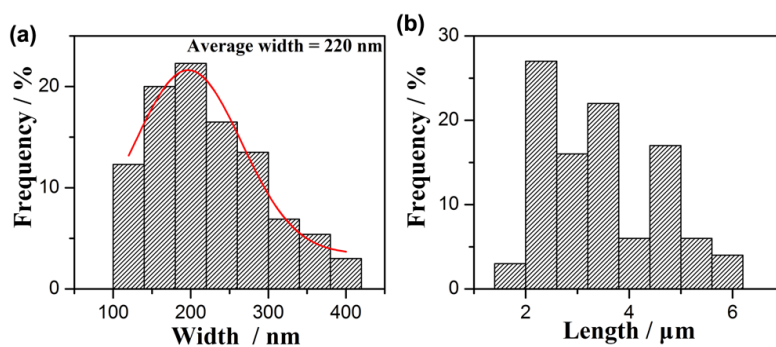

Figure S3. (a) Distribution histogram of the width of V<sub>2</sub>O<sub>5</sub> based on 130 nanoribbons;

(b) Statistic of the length of V<sub>2</sub>O<sub>5</sub> based on 130 nanoribbons.

4. XRD pattern of Cu/V<sub>2</sub>O<sub>5</sub> composite after SERS detection

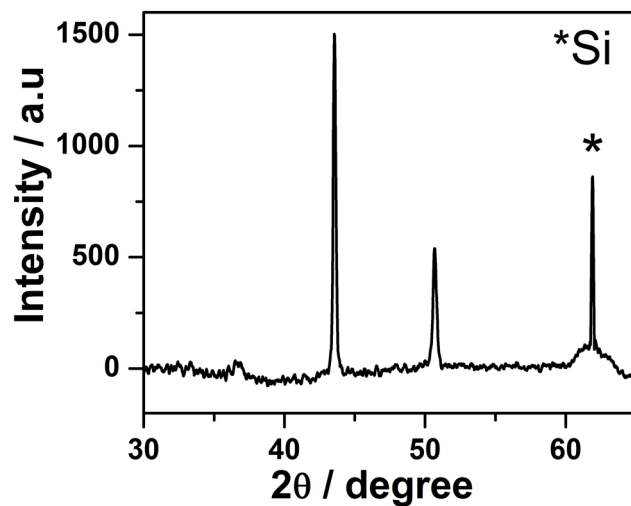

Figure S4. XRD pattern of Cu/V<sub>2</sub>O<sub>5</sub> composite after SERS detection, showing two strong copper diffraction peaks.

5. XRD pattern of Cu/V<sub>2</sub>O<sub>5</sub> composite after catalytic reaction

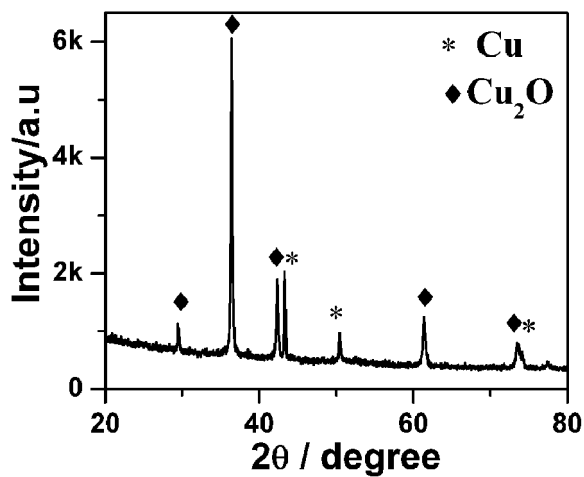

Figure S5. XRD pattern of Cu/V<sub>2</sub>O<sub>5</sub> composite after catalytic reaction.

## 6. Enhancement factor (EF) calculation

The average SERS enhancement factor (EF) is calculated based on the formula:

$$EF = \frac{I_{SERS} N_0}{I_0 N_{SERS}}$$

where  $I_{SERS}$  and  $N_{SERS}$  are the peak intensity of Raman and probe molecule number under SERS conditions, respectively.  $I_0$  and  $N_0$  are the peak intensity of the normal Raman and probe molecule number measured with 0.01 M R6G aqueous solution.

$$N_0 = n_0 N_A = C_0 V_0 N_A;$$

$$N_{SERS} = n_{SERS} N_A = C_{SERS} V_{SERS} N_A$$

where  $n_0$  and  $n_{SERS}$  are the amount substance of R6G molecules in the scattering volume;  $V_0$  and  $V_{SERS}$  are the scattering volume ( $V_0 = V_{SERS}$ );  $C_0$  and  $C_{SERS}$  are the concentration of R6G solution;  $N_A$  is Avogadro constant.

$$\text{So, } EF = \frac{I_{SERS} N_0}{I_0 N_{SERS}} = \frac{I_{SERS} C_0 V_0 N_A}{I_0 C_{SERS} V_{SERS} N_A} = \frac{I_{SERS} C_0}{I_0 C_{SERS}} = \frac{3897 \times 10^{-2}}{205 \times 10^{-7}} = 1.9 \times 10^6$$
